# Supplementary material for: Pharmacological Ascorbate Radiosensitizes Pancreatic Cancer
Source: Oxford University Press journal article supplement (doi:10.1158/0008-5472.can-14-1707), 2015-06-16
Supplement: 00085472can141707-sup-132871_2_supp_0_npqxjk.docx [file 00085472can141707-sup-132871_2_supp_0_npqxjk.docx]

Table S1. Summary statistics for tumor volume measurements in the mixed linear regression analysis in MIA PaCa-2 tumor xenografts. The sample sizes (N) given in the table are the total number of measurements available within each group. Pairwise comparisons were carried out to assess group differences.

| **Group** | **N** | **Mean (mm3)** | **S.D.** |
| --- | --- | --- | --- |
| Control | 74 | 397 | 449 |
| Ascorbate | 80 | 292* | 366 |
| IR | 78 | 228* | 300 |
| Ascorbate + IR | 202 | 120*# | 222 |

**P* < 0.01 vs. control. #P < 0.05 *vs*. ascorbate
