# Supplementary material for: Pharmacological Ascorbate Radiosensitizes Pancreatic Cancer
Source: Oxford University Press journal article supplement (doi:10.1158/0008-5472.can-14-1707), 2015-06-16
Supplement: 00085472can141707-sup-132871_2_supp_0_npqxl8.docx [file 00085472can141707-sup-132871_2_supp_0_npqxl8.docx]

**Table S3.** Summary statistics for tumor volume measurements in the mixed linear regression analysis in orthotopic tumor xenografts. The sample sizes (N) given in the table are the total number of measurements available within each group. Pairwise comparisons were carried out to assess group differences.

| **Group** | **N** | **Mean (mean radiance photons/s-1/cm2)** | **S.D. (mean radiance photons/s-1/cm2)** |
| --- | --- | --- | --- |
| Control | 41 | 1.8 | 2.3 |
| Ascorbate | 33 | 1.6 | 2.0 |
| IR | 45 | 1.9 | 2.3 |
| Ascorbate + IR | 57 | 0.9*# | 1.2 |

**P* < 0.05 *vs*. control. #P < 0.05 *vs*. IR
